# Supplementary material for: Ring-size controllable metallamacrocycles as building blocks for the construction of microporous metal–organic frameworks
Source: Royal Society of Chemistry journal article supplement (doi:10.1039/c2cc17256a), 2012-01-01
Supplement: c2cc17256a.pdf [file c2cc17256a.pdf]

## Supporting Information

5      **Ring-size controllable Metallamacrocycles as Building Blocks for the  
Construction of Microporous Metal-Organic Frameworks**

Zhi-Qiang Jiang<sup>a,b</sup>, Gui-Yuan Jiang<sup>b</sup>, Fei Wang<sup>a</sup>, Zheng Zhao<sup>b,\*</sup>, Jian Zhang<sup>a,\*</sup>

*<sup>a</sup>State Key Laboratory of Structural Chemistry, Fujian Institute of Research on the  
Structure of Matter, Chinese Academy of Sciences, Fuzhou, Fujian 350002, P. R. China  
and <sup>b</sup>State Key Laboratory of Heavy Oil Processing, China University of Petroleum  
10      (Beijing), 102249 Beijing, China. E-mail: [zhj@fjirsm.ac.cn](mailto:zhj@fjirsm.ac.cn); [zhenzhao@cup.edu.cn](mailto:zhenzhao@cup.edu.cn)*

**Materials and Instrumentation.** All reagents were purchased commercially and used without further purification. FT-IR spectra were measured as KBr pellets on a Nicolet Magna 750 FT-IR spectrometer in the range of 400~4000  $\text{cm}^{-1}$ . All Powder X-ray diffraction (PXRD) analyses were recorded on a Rigaku Dmax2500 diffractometer with Cu  $K\alpha$  radiation ( $\lambda = 1.54056 \text{ \AA}$ ) with a step size of  $0.05^\circ$ .  
5 Thermal stability studies were carried out on a NETSCHZ STA-449C thermoanalyzer with a heating rate of  $10 \text{ }^\circ\text{C}/\text{min}$  under an  $\text{N}_2$  atmosphere. The adsorption experiments were performed on Micromeritics ASAP 2020 surface area and pore size analyzer.

**Synthesis of  $(\text{dma})_3[\text{Zn}_3(\text{btz})(\text{btc})_2(\text{DMF})]_3 \cdot 7(\text{DMF})$  (1):**

10 A mixture of  $\text{Zn}(\text{NO}_3)_2 \cdot 6\text{H}_2\text{O}$  (0.1000 g, 0.34 mmol), pyrazine (0.0300 g 0.37 mmol), 1H-Benzotriazole (Hbtz, 0.0500 g, 0.42 mmol), 1,3,5-Benzenetricarboxylic acid (1,3,5-BTC, 0.1000 g 0.48 mmol), and N,N-dimethylformamide (DMF, 8 mL) in a 23 mL Teflon-lined stainless steel vessel was heated at  $120 \text{ }^\circ\text{C}$  for 72 hours, and then cooled to room temperature. The resulting colorless transparent crystals were obtained, washed with acetone, and dried at room temperature (Yield: 75 %).

15 **Synthesis of  $(\text{tma})_4[\text{Zn}_3(\text{btz})(\text{btc})_2(\text{H}_2\text{O})]_4 \cdot 15(\text{DMF})$  (2):**

A mixture of  $\text{Zn}(\text{NO}_3)_2 \cdot 6\text{H}_2\text{O}$  (0.1000 g, 0.34 mmol), pyrazine (0.0300 g 0.37 mmol), 1H-Benzotriazole (Hbtz, 0.0500 g, 0.42 mmol), 1,3,5-Benzenetricarboxylic acid (1,3,5-BTC, 0.0420 g 0.20 mmol), tetramethylammonium bromide (0.0300g 0.20 mmol), and N,N-dimethylformamide (DMF, 8 mL) in a 23 mL Teflon-lined stainless steel vessel was heated at  $120 \text{ }^\circ\text{C}$  for 72 hours, and then  
20 cooled to room temperature. The resulting colorless transparent crystals were obtained, washed with acetone, and dried at room temperature (Yield: 83 %).

**Synthesis of  $(\text{tma})_4[\text{Zn}_3(\text{tz})(\text{btc})_2(\text{H}_2\text{O})]_4 \cdot x(\text{DMF})$  (3):**

A mixture of  $\text{Zn}(\text{NO}_3)_2 \cdot 6\text{H}_2\text{O}$  (0.1600 g, 0.54 mmol), pyrazine (0.0300 g 0.37 mmol), 1,2,3-1H-Triazole (1,2,3-tz, 0.0500 g, 0.73 mmol), 1,3,5-Benzenetricarboxylic acid (1,3,5-BTC,  
25 0.0500 g 0.24 mmol), tetramethylammonium bromide (0.0300g 0.20 mmol), and N,N-dimethylformamide (DMF, 8 mL) in a 23 mL Teflon-lined stainless steel vessel was heated at  $120 \text{ }^\circ\text{C}$  for 72 hours, and then cooled to room temperature. The resulting colorless transparent crystals were obtained, washed with acetone, and dried at room temperature. The final sample is not pure as characterized by powder XRD (Figure S12).

30

**X-ray Crystallographic Study:** Suitable single crystals of **1-3** were carefully selected under an optical microscope and glued to thin glass fibers. Single-crystal X-ray diffraction analyses were performed on a computer-controlled Bruker P4 diffractometer with graphite-monochromated Mo  $K\alpha$  radiation ( $\lambda_{\text{Mo } K\alpha} = 0.71073 \text{ \AA}$ ) at  $T = 293.2 \text{ K}$ . The structures were solved using the direct method and refined by  
35 full-matrix least-squares methods on  $F^2$  by using the SHELX-97 program package. The crystallographic data and details of the structure for three compounds are listed in Table S1.

**Table S1 Crystal data summary for all compounds.**

| Compound reference                                                            | <b>1</b>                                                                        | <b>2</b>                                                                       | <b>3</b>                                                                       |
|-------------------------------------------------------------------------------|---------------------------------------------------------------------------------|--------------------------------------------------------------------------------|--------------------------------------------------------------------------------|
| Chemical formula                                                              | C <sub>75</sub> H <sub>34</sub> N <sub>10</sub> O <sub>37</sub> Zn <sub>9</sub> | C <sub>28</sub> H <sub>22</sub> N <sub>4</sub> O <sub>13</sub> Zn <sub>3</sub> | C <sub>24</sub> H <sub>20</sub> N <sub>4</sub> O <sub>13</sub> Zn <sub>3</sub> |
| Formula Mass                                                                  | 2255.45                                                                         | 818.67                                                                         | 768.55                                                                         |
| Crystal system                                                                | Orthorhombic                                                                    | Tetragonal                                                                     | Tetragonal                                                                     |
| <i>a</i> / Å                                                                  | 23.157(5)                                                                       | 22.000(10)                                                                     | 21.265(4)                                                                      |
| <i>b</i> / Å                                                                  | 27.317(7)                                                                       | 22.000(10)                                                                     | 21.265(4)                                                                      |
| <i>c</i> / Å                                                                  | 22.592(5)                                                                       | 23.000(10)                                                                     | 22.666(6)                                                                      |
| <i>α</i> /°                                                                   | 90.00                                                                           | 90.00                                                                          | 90.00                                                                          |
| <i>β</i> /°                                                                   | 90.00                                                                           | 90.00                                                                          | 90.00                                                                          |
| <i>γ</i> /°                                                                   | 90.00                                                                           | 90.00                                                                          | 90.00                                                                          |
| Unit cell volume/ Å <sup>3</sup>                                              | 14291(6)                                                                        | 11132(9)                                                                       | 10250(4)                                                                       |
| Temperature/K                                                                 | 293(2)                                                                          | 293(2)                                                                         | 293(2)                                                                         |
| Space group                                                                   | <i>Pnmm</i>                                                                     | <i>I4/m</i>                                                                    | <i>I4/m</i>                                                                    |
| No. of formula units per unit cell, <i>Z</i>                                  | 4                                                                               | 8                                                                              | 8                                                                              |
| No. of reflections measured                                                   | 85197                                                                           | 6807                                                                           | 18872                                                                          |
| No. of independent reflections                                                | 12911                                                                           | 4831                                                                           | 2485                                                                           |
| <i>R</i> <sub>int</sub>                                                       | 0.1179                                                                          | 0.0384                                                                         | 0.0771                                                                         |
| Final <i>R</i> <sub><i>I</i></sub> values ( <i>I</i> > 2σ( <i>I</i> ))        | 0.0518                                                                          | 0.0543                                                                         | 0.0781                                                                         |
| Final <i>wR</i> ( <i>F</i> <sup>2</sup> ) values ( <i>I</i> > 2σ( <i>I</i> )) | 0.1461                                                                          | 0.1435                                                                         | 0.2141                                                                         |
| Final <i>R</i> <sub><i>I</i></sub> values (all data)                          | 0.0677                                                                          | 0.0739                                                                         | 0.0945                                                                         |
| Final <i>wR</i> ( <i>F</i> <sup>2</sup> ) values (all data)                   | 0.1543                                                                          | 0.1564                                                                         | 0.2374                                                                         |
| Goodness of fit on <i>F</i> <sup>2</sup>                                      | 0.928                                                                           | 0.992                                                                          | 1.060                                                                          |

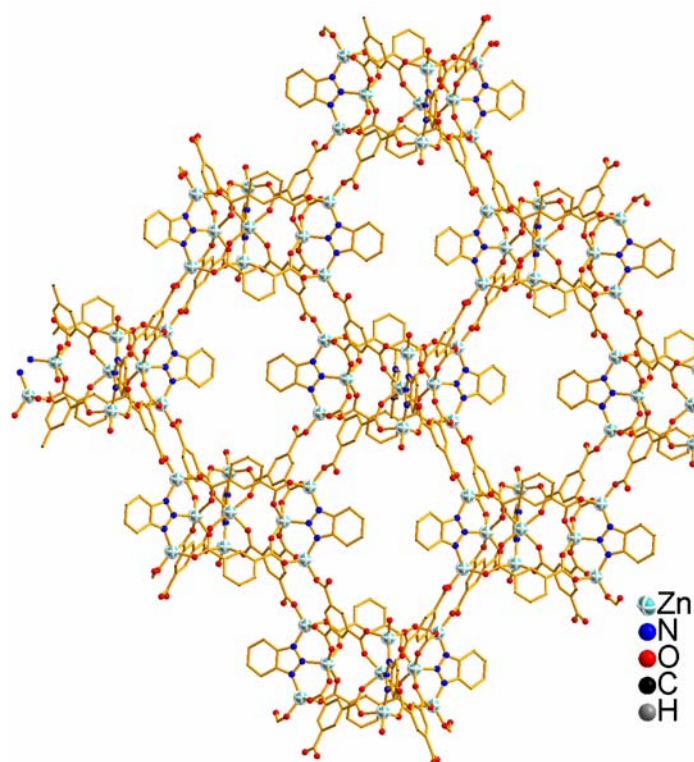

**Figure S1.** View of the 4<sup>th</sup> layer along the ac plane in **1**.

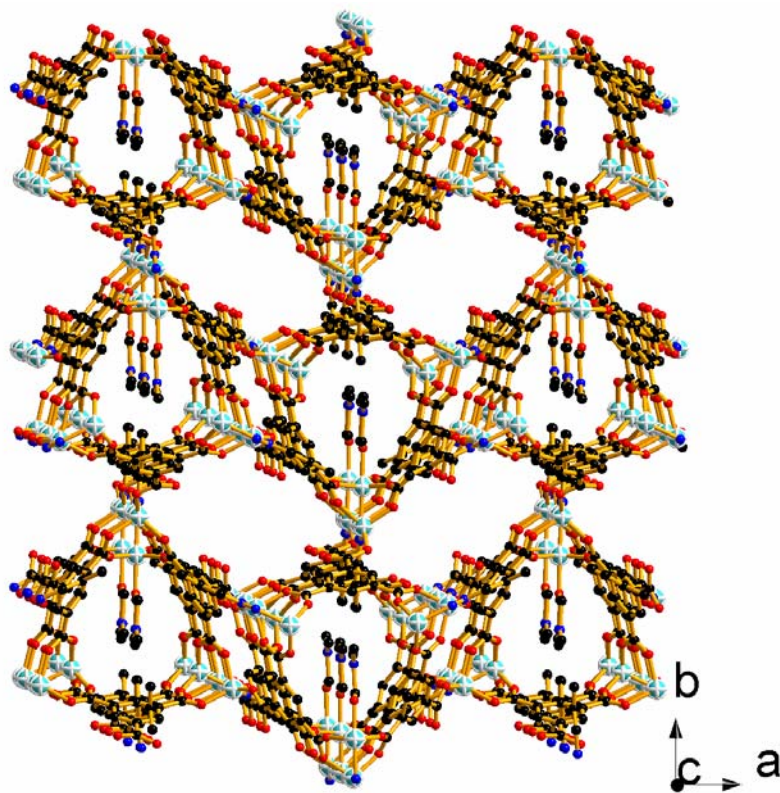

**Figure S2.** The 3D packing structure of **1**.

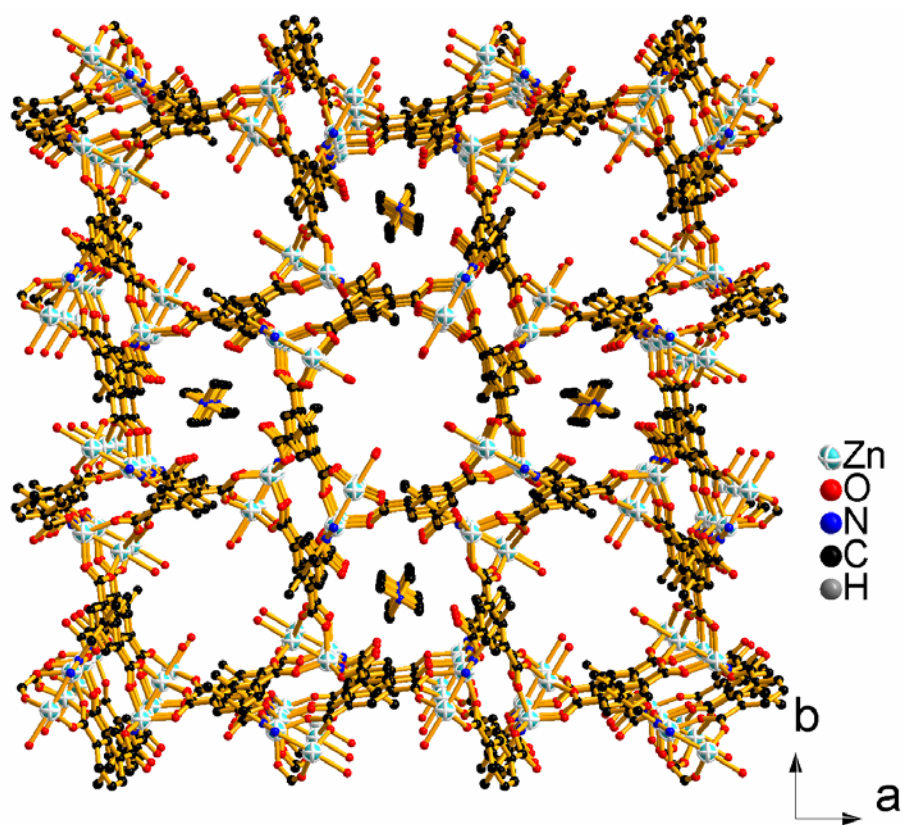

**Figure S3.** The 3D packing structure of **2**, showing the location of the tma cation in the center of the channels.

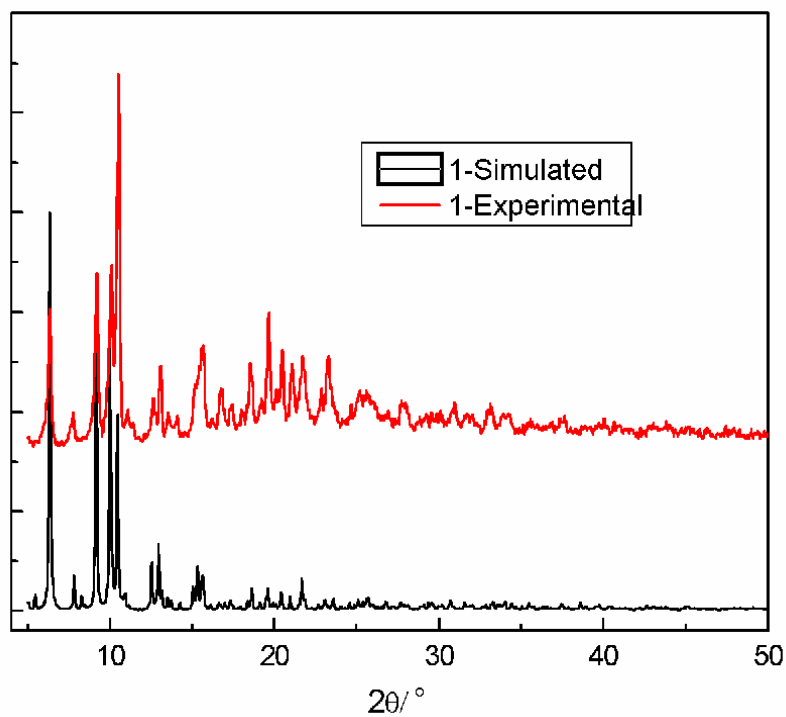

**Figure S4.** The Powder X-ray diffraction patterns of **1**.

To evaluate the thermal behavior, thermogravimetric analysis (TGA) of **1** were performed under N<sub>2</sub> atmosphere with a heating rate of 10 °C·min<sup>-1</sup> in the temperature range 30-700 °C (Figure S5). The TGA curve for **1** reveals that the solvents on the sample surface are gradually removed in proceeding from 30 °C to 100 °C. The weight losses from 100 to 250 °C corresponds to the removal of the coordinated and free guest molecules. The observed weight loss of 22.1% is in agreement with the calculated value of 20%. The third weight losses from 250 °C to 400 °C may correspond to the release of the charge-balancing dimethylamine(dma) cations. The observed weight loss of 5.1% is in agreement with the calculated value of 4.6%. Above 400 °C, the weight loss is due to the decomposition of the organic ligands, accompanying the collapse of the whole framework.

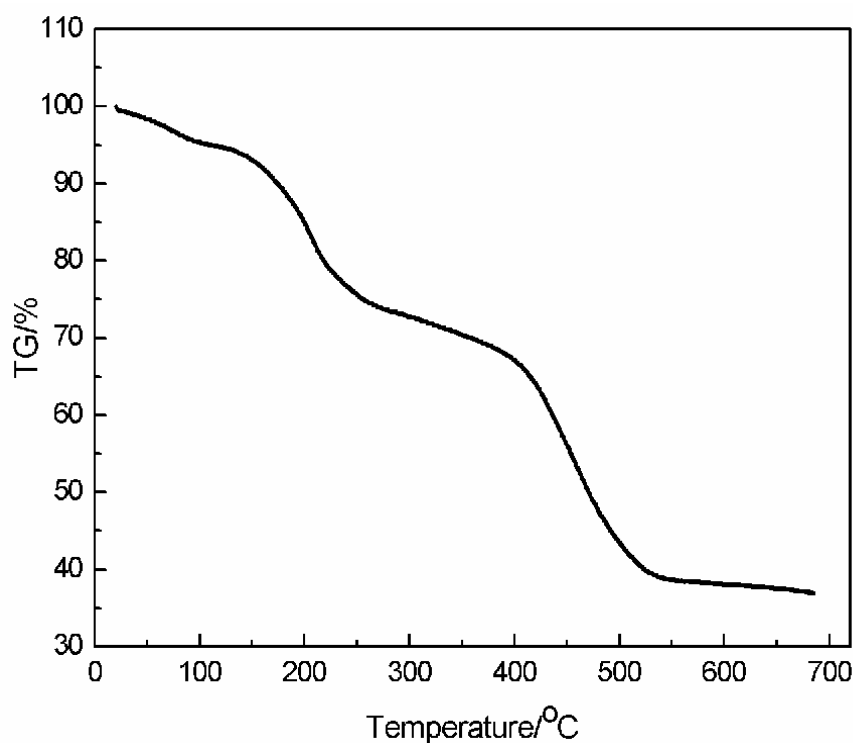

**Figure S5.** The TGA plot of **1**.

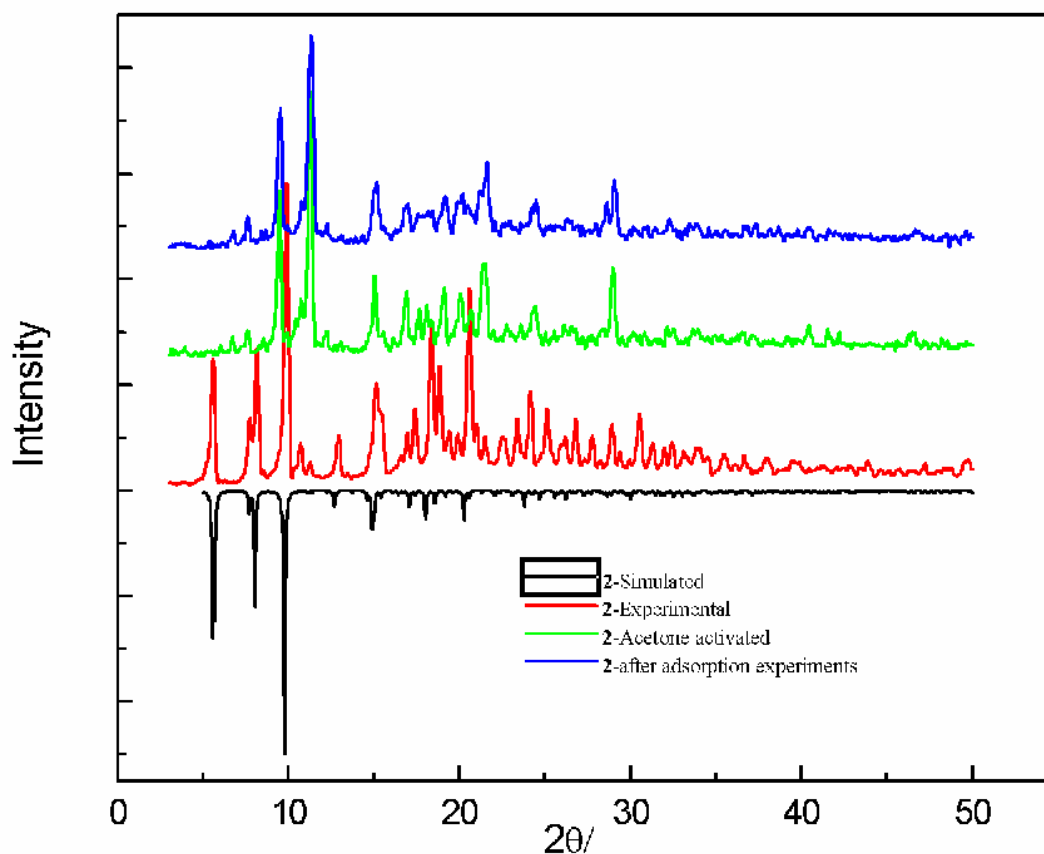

**Figure S6.** The Powder XRD patterns of **2**.

To evaluate the thermal behavior, thermogravimetric analysis (TGA) of **2** were performed under  $N_2$  atmosphere with a heating rate of  $10\text{ }^\circ\text{C}\cdot\text{min}^{-1}$  in the temperature range  $20\text{--}650\text{ }^\circ\text{C}$  (Figure S7). The TGA curve for **2** reveals that the solvents on the sample surface are gradually removed in proceeding from  $20\text{ }^\circ\text{C}$  to  $85\text{ }^\circ\text{C}$ . The observed weight loss of 24.6% (calcd 25.5%) from  $85$  to  $350\text{ }^\circ\text{C}$  corresponds to the removal of the coordinated and free guest molecules. Above  $350\text{ }^\circ\text{C}$ , the weight loss is due to the release of the charge-balancing tetramethylammonium (tma) cations and the decomposition of the organic ligands, accompanying the collapse of the whole framework.

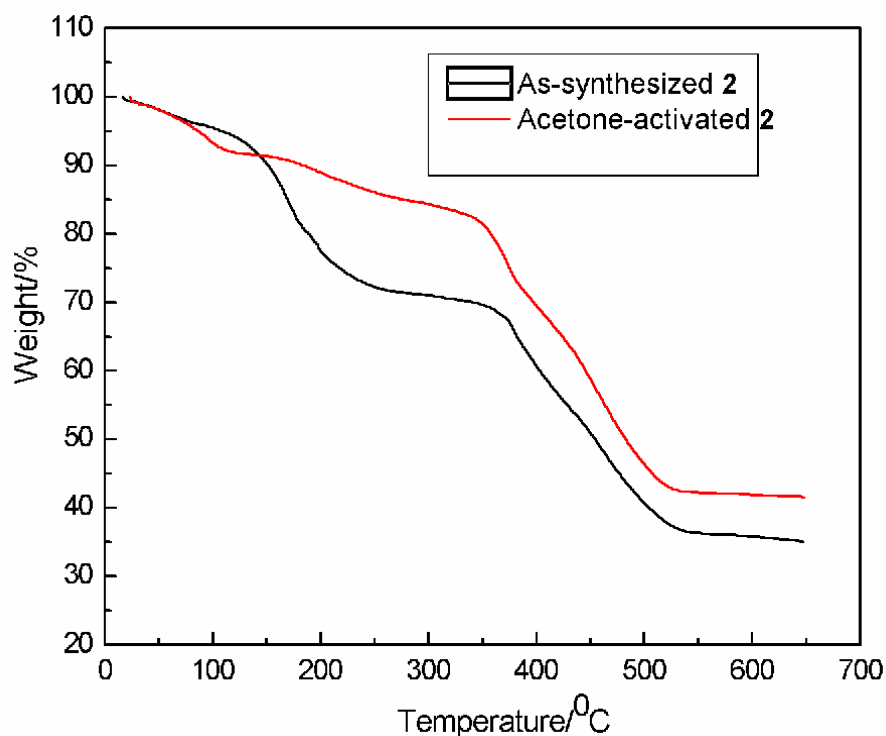

**Figure S7.** The TGA plots of **2**.

The activated sample of **2** was prepared by exchanging the solvent in as-synthesized **2** with acetone, followed by evacuation at room temperature. The gas-adsorption measurements ( $N_2$ ,  $CO_2$ , and  $H_2$ ) of **2** were performed on a Micromeritics ASAP 2020 surface-area and pore-size analyzer (Figure S8).

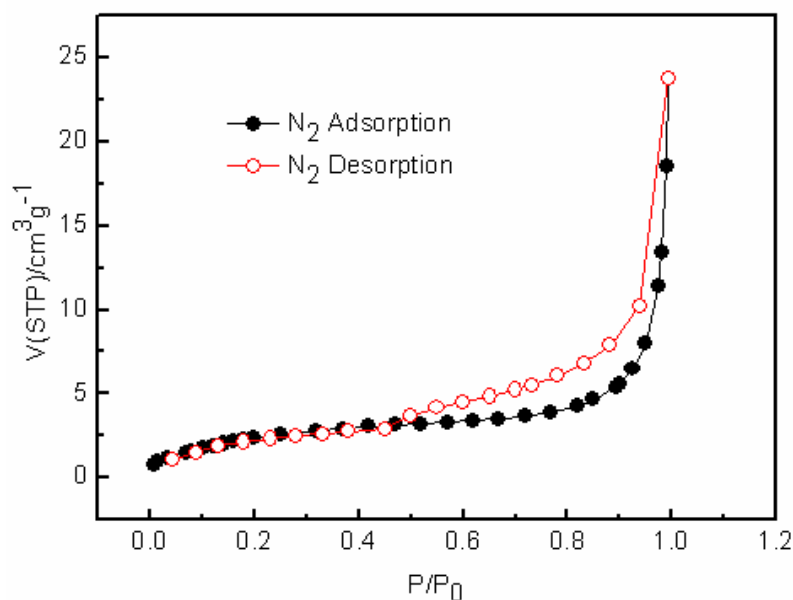

**Figure S8.** The  $N_2$  (●: adsorption, ○: desorption) isotherms at 77 K for **1**.



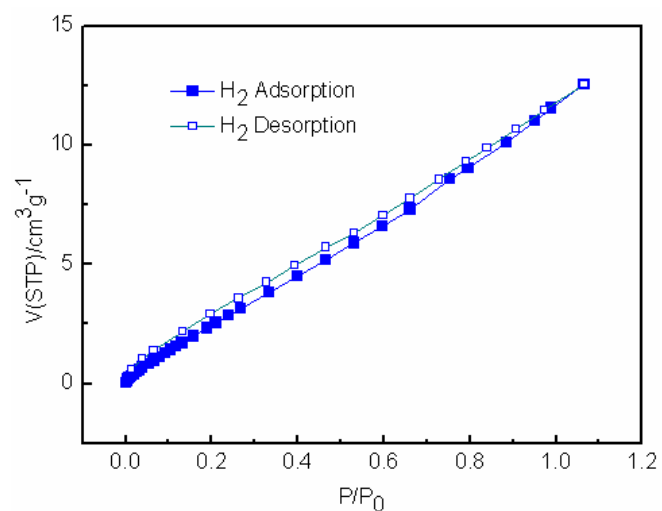

**Figure S9.** The H<sub>2</sub> (■: adsorption, □: desorption) isotherms at 77 K for **1**.

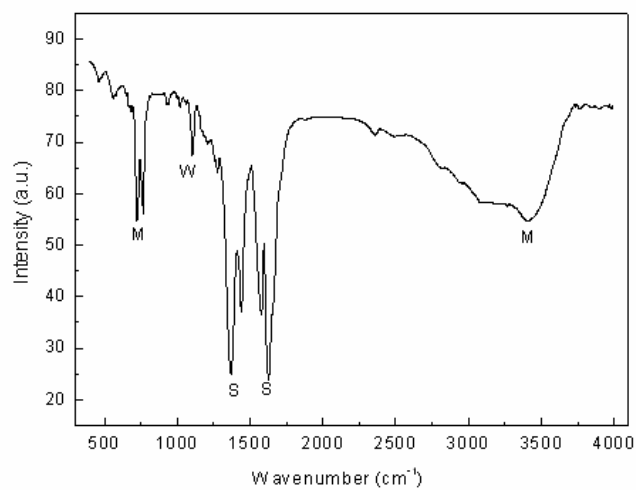

**Figure S10.** Infra-red spectra of compound **1**.

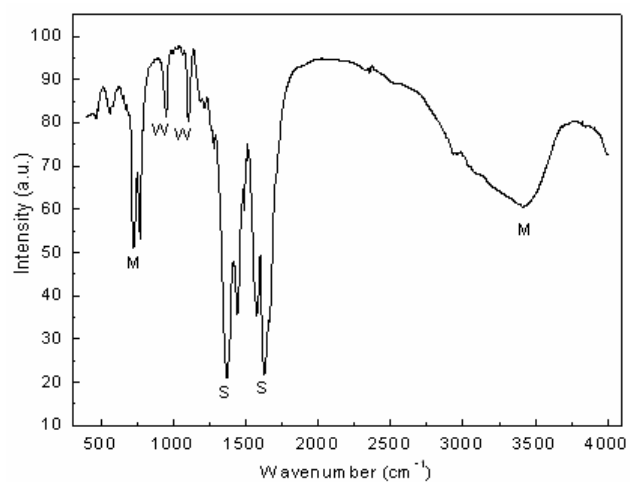

**Figure S11.** Infra-red spectra of compound **2**.

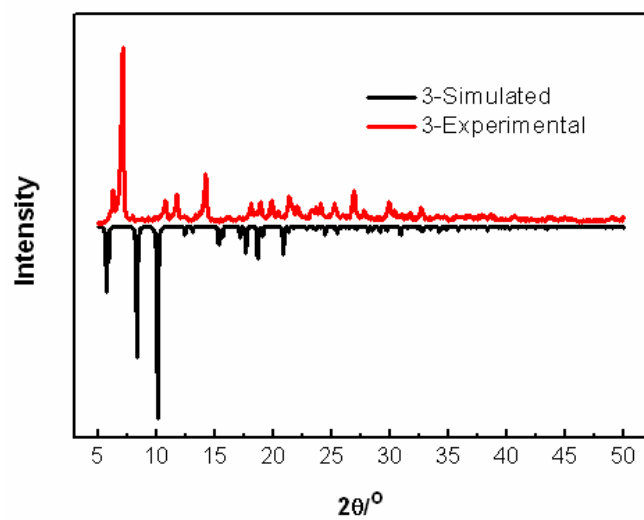

**Figure S12.** The Powder XRD patterns of impure compound 3.
